# Supplementary material
Source: MDPI journal article supplement (https://www.mdpi.com/2073-4344/14/3/200)
Supplement: s1 [file s1]

## Article

# A Study on the Pyrolysis Behavior and Product Evolution of Typical Wood Biomass to Hydrogen-Rich Gas Catalyzed by the Ni-Fe/HZSM-5 Catalyst

Xueqin Li <sup>1,2</sup>, Yan Lu <sup>1</sup>, Peng Liu <sup>1,\*</sup>, Zhiwei Wang <sup>3,4</sup>, Taoli Huhe <sup>1</sup>, Zhuo Chen <sup>5</sup>, Youqing Wu <sup>2</sup> and Tingzhou Lei <sup>1,\*</sup>

<sup>1</sup> Changzhou Key Laboratory of Biomass Green, Safe & High Value Utilization Technology, National-Local Joint Engineering Research Center of Biomass Refining and High-Quality Utilization, Institute of Urban and Rural Mining, Changzhou University, Changzhou, 213164, China; lxq88889@126.com (X.L.); luyan6667@163.com (Y.L.); hhtaoli@cczu.edu.cn (T.H.)

<sup>2</sup> Department of Chemical Engineering for Energy Resources, School of Resources and Environmental Engineering, East China University of Science and Technology, Shanghai 200237, China; wyq@ecust.edu.cn

<sup>3</sup> School of Environmental Engineering, Henan University of Technology, Zhengzhou 450001, China; zw.wang@gaut.edu.cn

<sup>4</sup> Institute for Carbon Neutrality, Henan University of Technology, Zhengzhou 450001, China

<sup>5</sup> School of Management and Economics, North China University of Water Resources and Electric Power, Zhengzhou 450046, China; chenzhuo@ncwu.edu.cn

\* Correspondence: liupeng@cczu.edu.cn (P.L.); ltz@cczu.edu.cn (T.L.)

**Citation:** Li, X.; Lu, Y.; Liu, P.; Wang, Z.; Huhe, T.; Chen, Z.; Wu, Y.; Lei, T. A Study on the Pyrolysis Behavior and Product Evolution of Typical Wood Biomass to Hydrogen-Rich Gas Catalyzed by the Ni-Fe/HZSM-5 Catalyst. *Catalysts* **2024**, *14*, x. <https://doi.org/10.3390/xxxxx>

Academic Editor: Anna Maria Raspolli Galletti

Received: 1 February 2024

Revised: 8 March 2024

Accepted: 14 March 2024

Published: 19 March 2024

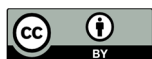

**Copyright:** © 2024 by the authors. Submitted for possible open access publication under the terms and conditions of the Creative Commons Attribution (CC BY) license (<https://creativecommons.org/licenses/by/4.0/>).

## Supplementary material

36

Table S1 Numbers of liquid products

37

| Nu. | Name                                 | Formula                                                                             | Nu. | Name                                     | Formula                                                                               |
|-----|--------------------------------------|-------------------------------------------------------------------------------------|-----|------------------------------------------|---------------------------------------------------------------------------------------|
| 1   | Acetic acid                          |    | 15  | Dodecanoic acid, 3-hydroxy-              |    |
| 2   | Propanoic acid                       |    | 16  | 5-Hydroxymethylfurfural                  |    |
| 3   | 2-Propanone, 1-hydroxy-              |    | 17  | Phenol, 2,6-dimethoxy-                   |    |
| 4   | 2,3-Butanediol                       |    | 18  | 1-Hydroxy-2-butanone                     |    |
| 5   | 3-Furaldehyde                        |   | 19  | Acetic acid, (acetyloxy)-                |   |
| 6   | 2-Furanmethanol                      |  | 20  | Succindialdehyde                         |  |
| 7   | 2-Cyclopenten-1-one                  |  | 21  | Furfural                                 |  |
| 8   | Ethanone, 1-(2-furanyl)-             |  | 22  | 2-Propanone, 1-(acetyloxy)-              |  |
| 9   | Carbamic acid, methyl-, phenyl ester |  | 23  | 2-Cyclopenten-1-one, 2-hydroxy-          |  |
| 10  | 2-Furancarboxaldehyde, 5-methyl-     |  | 24  | 2-Cyclopenten-1-one, 2-hydroxy-3-methyl- |  |
| 11  | Butyrolactone                        |  | 25  | Creosol                                  |  |
| 12  | Phenol, 2-methoxy-                   |  | 26  | Phenol, 4-ethyl-2-methoxy-               |  |

|    |                               |                                                                                   |    |                                         |                                                                                     |
|----|-------------------------------|-----------------------------------------------------------------------------------|----|-----------------------------------------|-------------------------------------------------------------------------------------|
| 13 | 2-Propyl-tetrahydropyran-3-ol | 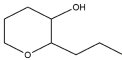 | 27 | 2-Methoxy-4-vinylphenol                 |  |
| 14 | Benzofuran, 2,3-dihydro-      |  | 28 | Phenol, 2-methoxy-5-(1-propenyl)-, (E)- |  |
